# Supplementary material
Source: PubMed Central journal article supplement (PMC3376461)
Supplement: Supp_Data.pdf [file Supp_Data.pdf]

## Supplementary Data

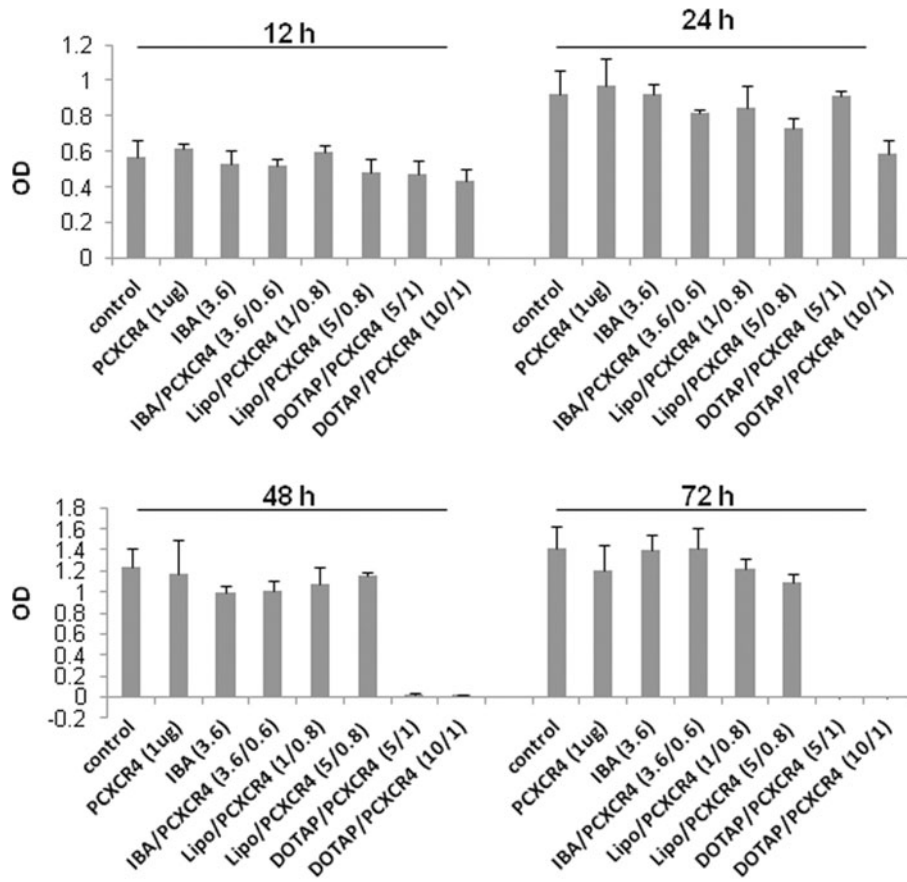

**SUPPLEMENTARY FIG. S1.** Viability of cationic-liposomes/PCXCR4-transfected KG-1 cells at 12, 24, 48, and 72 h after transfection. PCXCR4, pcDNA1/CXCR4.

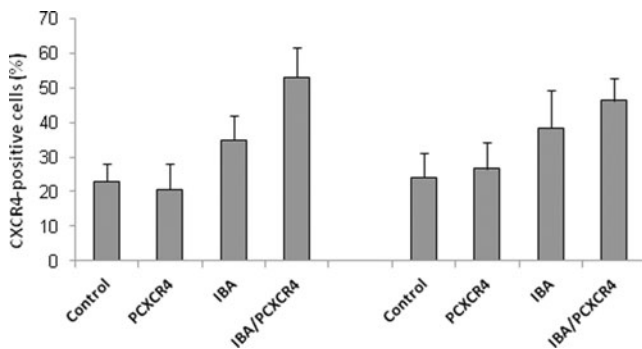

**SUPPLEMENTARY FIG. S2.** The percentage of CXCR4-expressing CB CD34<sup>+</sup> cells at 48 and 72 h after IBAfect-mediated transfection (3.6  $\mu$ L IBAfect and 0.6  $\mu$ g pcDNA1/CXCR4). CXCR4, CXC chemokine receptor 4; CB, cord blood.
